# Supplementary material for: Iatrogenic Creutzfeldt-Jakob disease with Amyloid-β pathology: an international study
Source: PubMed Central journal article supplement (PMC5759292; doi:10.1186/s40478-017-0503-z), 2018-01-08

## Supplementary Figure 2

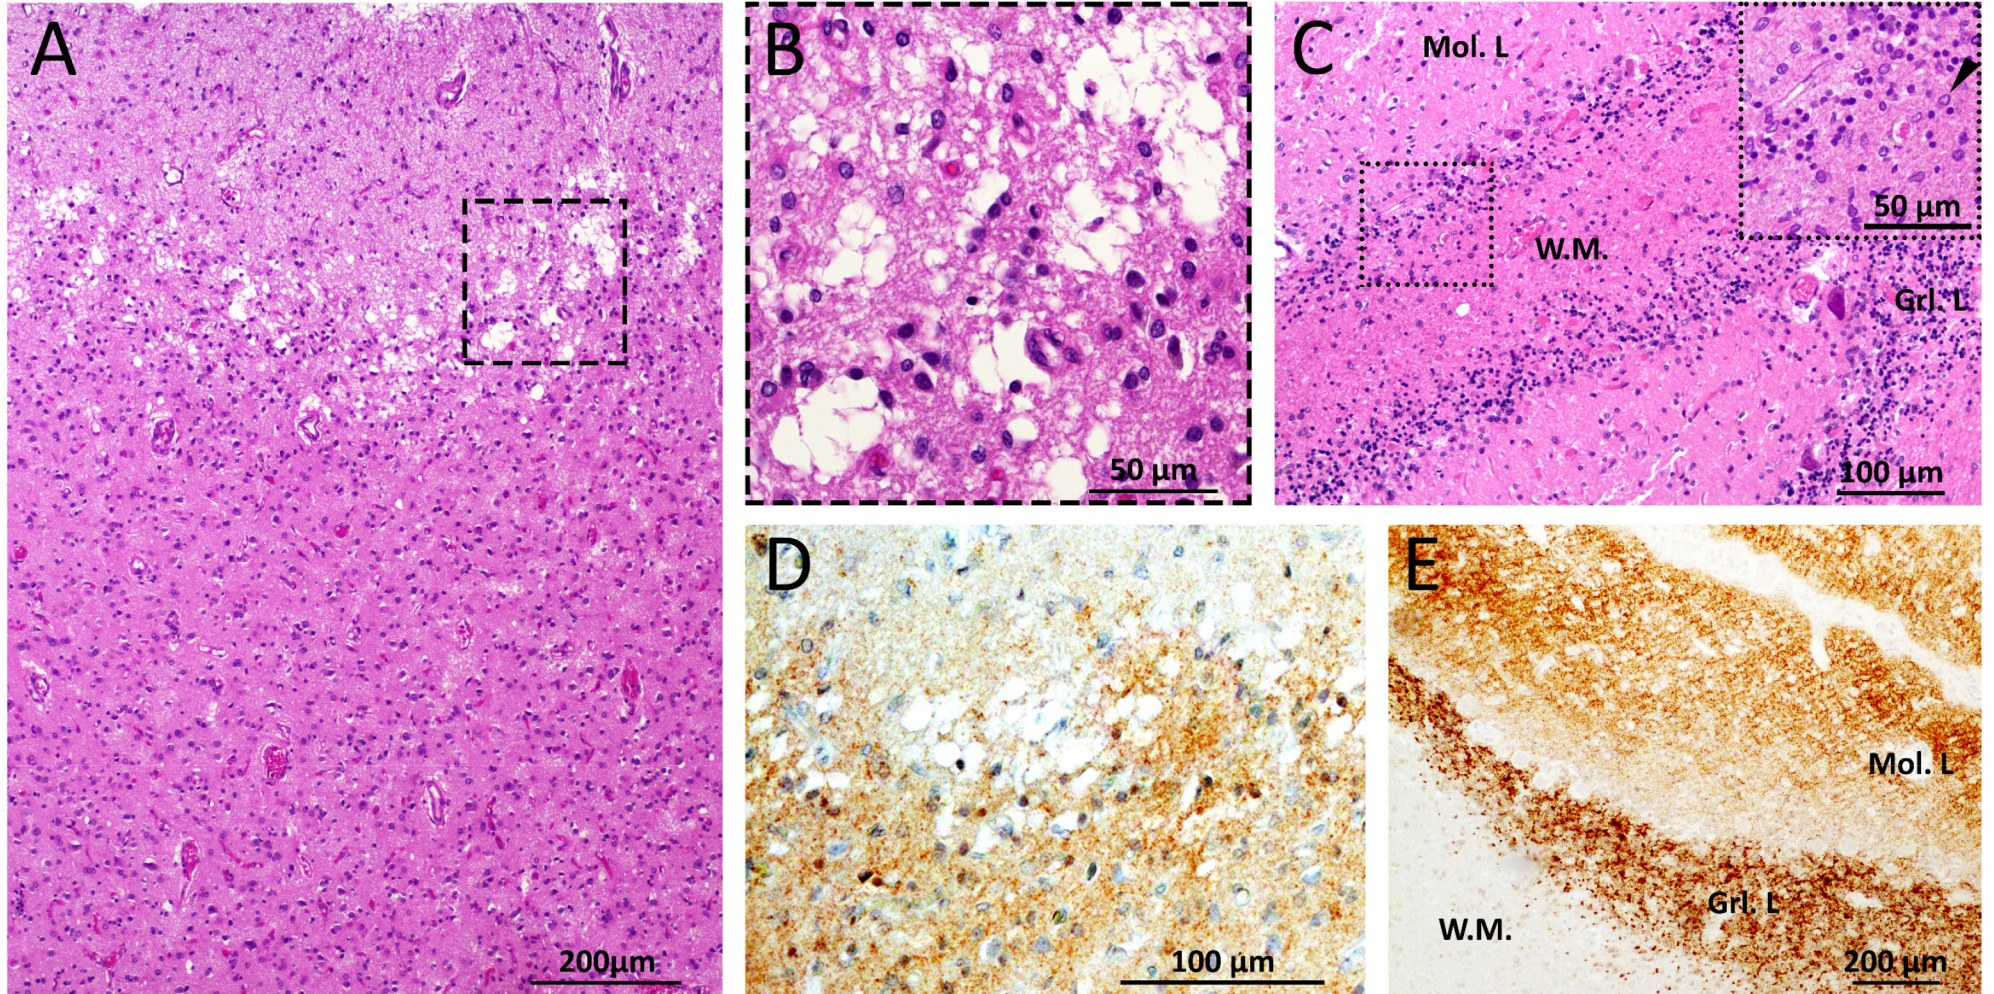

Supplement: 40478_2017_503_MOESM4_ESM.pdf [file 40478_2017_503_MOESM4_ESM.pdf]
