# Supplementary material for: Iatrogenic Creutzfeldt-Jakob disease with Amyloid-β pathology: an international study
Source: Springer Nature journal article supplement (doi:10.1186/s40478-017-0503-z), 2018-01-08

# Supplementary Figure 4

**A**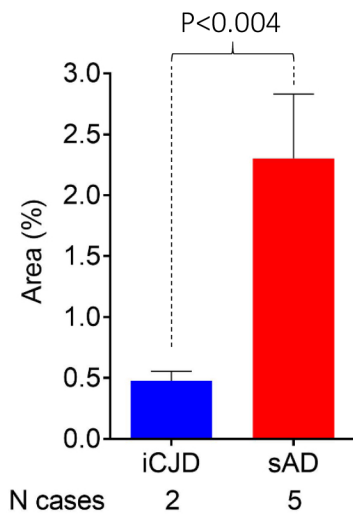**B**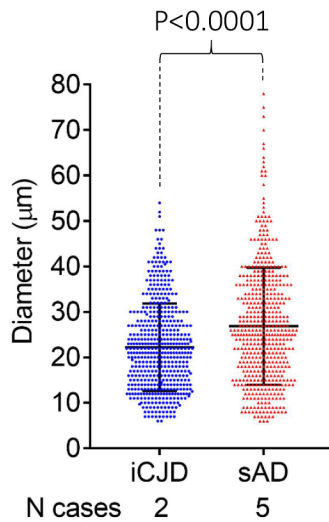**C**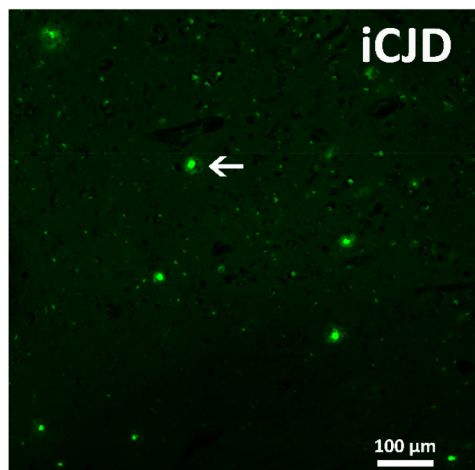**D**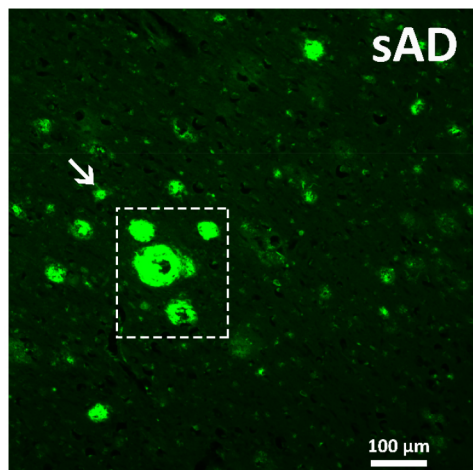

Supplement: MOESM6 [file 25666324]
